# Supplementary material
Source: HighWire-hosted journal article supplement (https://erj.ersjournals.com/content/58/2/2004107)
Supplement: inline-supplementary-material-2 [file inline-supplementary-material-2.pdf]

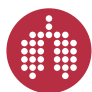

# Asthma prescribing according to Arg16Gly beta-2 genotype: a randomised trial in adolescents

SHAREABLE PDF

Tom Ruffles<sup>1</sup>, Christina J. Jones<sup>2</sup>, Colin Palmer<sup>3</sup>, Steve Turner<sup>4</sup>, Jonathan Grigg<sup>5</sup>, Roger Tavendale<sup>3</sup>, Fiona Hogarth<sup>6</sup>, Petra Rauchhaus<sup>7</sup>, Kristina Pilvinyte<sup>6</sup>, Romanie Hannah<sup>1</sup>, Helen Smith<sup>8,9</sup>, Roberta Littleford<sup>10</sup>, Brian Lipworth<sup>11</sup> and Somnath Mukhopadhyay<sup>1,3</sup>

<sup>1</sup>Academic Dept of Paediatrics, Royal Alexandra Children's Hospital, Brighton and Sussex Medical School, Brighton, UK. <sup>2</sup>School of Psychology, Faculty of Health and Medical Sciences, University of Surrey, Guildford, UK. <sup>3</sup>Division of Population and Health Genomics, University of Dundee, Ninewells Hospital and Medical School University of Dundee, Dundee, UK. <sup>4</sup>Child Health, University of Aberdeen, Aberdeen, UK. <sup>5</sup>Blizard Institute, Queen Mary University of London, London, UK. <sup>6</sup>Tayside Clinical Trials Unit, University of Dundee, Dundee, UK. <sup>7</sup>Tayside Medical Science Centre TASC, University of Dundee, Dundee, UK. <sup>8</sup>Division of Primary Care and Public Health, Brighton and Sussex Medical School, Brighton, UK. <sup>9</sup>Family Medicine and Primary Care, Lee Kong Chian School of Medicine, Nanyang Technological University Singapore, Singapore. <sup>10</sup>Center for Clinical Research, University of Queensland, Brisbane, Australia. <sup>11</sup>Scottish Centre for Respiratory Research, Ninewells Hospital and Medical School, University of Dundee, Dundee, UK.

Corresponding author: Brian Lipworth ([b.j.lipworth@dundee.ac.uk](mailto:b.j.lipworth@dundee.ac.uk))

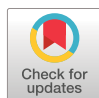

Shareable abstract (@ERSpublications)

Personalised prescribing in adolescents with asthma demonstrated that  $\beta_2$ -adrenoreceptor genotype directed treatment results in a small but significant improvement in PAQLQ.  $\beta_2$ -adrenoreceptor genotype guided treatment requires further investigation. <https://bit.ly/3oDvP1N>

**Cite this article as:** Ruffles T, Jones CJ, Palmer C, *et al.* Asthma prescribing according to Arg16Gly beta-2 genotype: a randomised trial in adolescents. *Eur Respir J* 2021; 58: 2004107 [DOI: 10.1183/13993003.04107-2020].

This single-page version can be shared freely online.

## Abstract

**Introduction** The A allele of rs1042713 (Arg16 amino acid) in the  $\beta_2$ -adrenoreceptor is associated with poor response to long-acting  $\beta_2$ -agonist (LABA) in young people with asthma. Our aim was to assess whether the prescribing of second-line controller with LABA or a leukotriene receptor antagonist according to Arg16Gly genotype would result in improvements in Pediatric Asthma-Related Quality of Life Questionnaire (PAQLQ).

**Methods** We performed a pragmatic randomised controlled trial (RCT) *via* a primary care clinical research network covering England and Scotland. We enrolled participants aged 12–18 years with asthma taking inhaled corticosteroids. 241 participants (mean $\pm$ SD age 14.7 $\pm$ 1.91 years) were randomised (1:1) to receive personalised care (genotype directed prescribing) or standard guideline care. Following a 4-week run-in participants were followed for 12 months. The primary outcome measure was change in PAQLQ. Asthma control, asthma exacerbation frequency and healthcare utilisation were secondary outcomes.

**Results** Genotype-directed prescribing resulted in an improvement in PAQLQ compared to standard care (0.16, 95% CI 0.00–0.31;  $p=0.049$ ), although this improvement was below the pre-determined clinical threshold of 0.25. The AA genotype was associated with a larger improvement in PAQLQ with personalised *versus* standard care (0.42, 95% CI 0.02–0.81;  $p=0.041$ ).

**Conclusion** This is the first RCT demonstrating that genotype-driven asthma prescribing is associated with a significant improvement in a clinical outcome compared to standard care. Adolescents with the AA homozygous genotype benefited most. The potential role of such  $\beta_2$ -adrenoceptor genotype directed therapy in younger and more severe childhood asthma warrants further exploration.

Copyright ©The authors 2021. For reproduction rights and permissions contact [permissions@ersnet.org](mailto:permissions@ersnet.org)

This article has supplementary material available from [erj.ersjournals.com](http://erj.ersjournals.com)

Received: 6 Nov 2020  
Accepted: 1 Jan 2021
